# Supplementary material for: 53BP1 and USP28 mediate p53 activation and G1 arrest after centrosome loss or extended mitotic duration
Source: PubMed Central journal article supplement — J Cell Biol. 2016 Jul 18;214(2):155–66. doi: 10.1083/jcb.201604081 (PMC4949453; doi:10.1083/jcb.201604081), 2016-07-18
Supplement: supp_jcb.201604081_JCB_201604081_sm.pdf [file supp_jcb.201604081_JCB_201604081_sm.pdf]

**A**

| clone    | Gene                                  | gRNA                  | library #    |
|----------|---------------------------------------|-----------------------|--------------|
| screen 1 | 1 TP53BP1                             | GTATACCTGCTTGTCTCTGTT | HGLibA_58342 |
|          | SF3A2                                 | CCTCATTGTTGTGAAGTGC   | HGLibB_43642 |
|          | 2 PCNT                                | GGCTGTCGATGCCTCTGTCC  | HGLibA_42929 |
|          | TP53BP1                               | GTATACCTGCTTGTCTCTGTT | HGLibA_58342 |
|          | USP28                                 | TGAGCGTTTAGTTTCTGCAG  | HGLibB_53255 |
|          | KLK13                                 | ACTCCTCATCTGAGCGAAGT  | HGLibB_25207 |
|          | C9orf64                               | GTATATTCCGAACCTGATCC  | HGLibB_06744 |
|          | SPARCL1                               | TTTGTGGAGGACAAAGTCAC  | HGLibB_46364 |
|          | TRIM37                                | CTCCCCAAAGTGACACTGA   | HGLibB_51413 |
|          | ADAM21                                | TCCTGAACGATTTCTCTCAA  | HGLibB_00752 |
|          | TP53BP1                               | CTGCTCAATGACCTGACTGA  | HGLibB_50991 |
|          | ZNF823                                | TGAACCTCACACAAGGAGGAG | HGLibB_56755 |
|          | USP28                                 | CTGCTGCAGCTCCGACGTCA  | HGLibA_60609 |
|          | hsa-mir-7159                          | CTTGCAATTCTATGTTAGT   | HGLibA_28919 |
|          | TP53BP1                               | GTATACCTGCTTGTCTCTGTT | HGLibA_58342 |
| screen 2 | 1 CTPS1                               | TTGACTCACCACGGGATGAC, | HGLibA_11667 |
|          | TP53BP1                               | CTGCTCAATGACCTGACTGA  | HGLibB_50991 |
|          | SEZ6L2                                | ATTGTGGATGGTGCCACCAC  | HGLibB_43632 |
|          | -                                     | CTGCTCACTGACGTGACGGAC | -            |
|          | -                                     | ACTTCTGAGAACTGCGTGC   | -            |
|          | 3 TP53BP1                             | GTATACCTGCTTGTCTCTGTT | HGLibA_58342 |
|          | NRG2                                  | AGCCACGCAGATGCCCGTGA  | HGLibA_39966 |
|          | NonTargetingControlGuideForHuman_0874 | TCATGCTTGCTTGGGCAAAA  | HGLibA_65257 |
|          | USP28                                 | TGAGCGTTTAGTTTCTGCAG  | HGLibB_53255 |
|          | -                                     | GCCCGTCCAGCCTAGCACT   | -            |
|          | DBT                                   | CACTTCTGAAAAACAACCTGC | HGLibB_12392 |
|          | TP53BP1                               | GTATACCTGCTTGTCTCTGTT | HGLibA_58342 |
|          | SYCE2                                 | TCGCACTTCTCTCCACCG    | HGLibA_55207 |
|          | USP28                                 | TGAGCGTTTAGTTTCTGCAG  | HGLibB_53255 |
|          | -                                     | TGAACCTCACACAATAGGA   | -            |
|          | -                                     | ACTGCTGTGACGTCGAC     | -            |
|          | 7 TP53BP1                             | GTATACCTGCTTGTCTCTGTT | HGLibA_58342 |
|          | BRD1                                  | GTAAATAGGATTGCGAATC   | HGLibB_04767 |
|          | USP28                                 | TGAGCGTTTAGTTTCTGCAG  | HGLibB_53255 |
|          | DHRS13                                | AGTGGCAAAGGCCCGCACCG  | HGLibA_13126 |
|          | TOMM40L                               | AGTGAAGCTCGTTGTCAACA  | HGLibA_58257 |
|          | 9 TRIM37                              | CTCCCCAAAGTGACACTGA   | HGLibB_51413 |

**B**

| #  | gRNA library | Gene         | counts     |           |
|----|--------------|--------------|------------|-----------|
|    |              |              | centrinone | untreated |
| 1  | HGLibA_08821 | CDKN1A       | 2008039    | 13723     |
| 2  | HGLibB_08815 | CDKN1A       | 1590038    | 10720     |
| 3  | HGLibB_50984 | TP53         | 1221915    | 7843      |
| 4  | HGLibB_50985 | TP53         | 1184166    | 7895      |
| 5  | HGLibA_26076 | hsa-mir-4731 | 870348     | 5710      |
| 6  | HGLibB_20190 | GRAPL        | 815396     | 5439      |
| 7  | HGLibB_06744 | C9orf64      | 635230     | 4259      |
| 8  | HGLibA_58337 | TP53         | 566927     | 3635      |
| 9  | HGLibA_58335 | TP53         | 511028     | 3652      |
| 10 | HGLibA_58342 | TP53BP1      | 463115     | 3428      |
| 11 | HGLibB_50991 | TP53BP1      | 407157     | 2969      |
| 12 | HGLibB_49833 | TMEM119      | 367835     | 2511      |
| 13 | HGLibA_43470 | PFN4         | 363562     | 2384      |
| 14 | HGLibB_25207 | KLK13        | 339303     | 2308      |
| 15 | HGLibA_63972 | ZNF76        | 332635     | 2309      |
| 16 | HGLibB_00752 | ADAM21       | 301287     | 2406      |
| 17 | HGLibB_47214 | ST6GALNAC3   | 300129     | 2280      |
| 18 | HGLibB_53255 | USP28        | 287950     | 1795      |
| 19 | HGLibB_35409 | PCDH8        | 272185     | 1985      |
| 20 | HGLibA_08820 | CDKN1A       | 269767     | 1889      |

| #  | gRNA library # | Gene         | counts     |           |
|----|----------------|--------------|------------|-----------|
|    |                |              | centrinone | untreated |
| 21 | HGLibB_46364   | SPARCL1      | 244621     | 1673      |
| 22 | HGLibA_10012   | CLECL1       | 234986     | 1525      |
| 23 | HGLibB_54049   | WDR5         | 219262     | 1513      |
| 24 | HGLibB_24626   | KIAA0895L    | 213848     | 1458      |
| 25 | HGLibB_49756   | TMED6        | 203719     | 1788      |
| 26 | HGLibA_28356   | hsa-mir-6781 | 195381     | 1359      |
| 27 | HGLibA_52561   | SLC5A5       | 185426     | 1233      |
| 28 | HGLibB_08779   | CDK5RAP2     | 182520     | 1434      |
| 29 | HGLibA_19433   | GMPS         | 168051     | 1178      |
| 30 | HGLibB_51413   | TRIM37       | 159383     | 1487      |
| 31 | HGLibA_47816   | RBM28        | 159187     | 1182      |
| 32 | HGLibA_49688   | RTN2         | 150774     | 1017      |
| 33 | HGLibA_39516   | NOA1         | 145033     | 983       |
| 34 | HGLibB_33013   | NUP50        | 144201     | 1016      |
| 35 | HGLibB_56755   | ZNF823       | 133056     | 1083      |
| 36 | HGLibA_60609   | USP28        | 107705     | 817       |
| 37 | HGLibB_20860   | HAUS6        | 88840      | 908       |
| 38 | HGLibA_64356   | ZWILCH       | 81402      | 602       |
| 39 | HGLibB_50986   | TP53         | 79573      | 657       |

Figure S1. **Results from the CRISPR/Cas9 screen.** (A) Table shows the gRNAs identified in each of the 15 type 1 colonies obtained in both screens. For this analysis, gRNAs were amplified from each colony, cloned, and identified by Sanger sequencing. All type 1 colonies contained a gRNA targeting *TP53BP1* (blue), *USP28* (green), or *TRIM37* (red). (B) For the first screen, a second approach was also taken in which all 32 colonies (6 type 1 and 26 type 2) were pooled. The gRNAs were then amplified and subjected to Illumina sequencing. The top hits from this analysis (according to the gRNA counts) included the genes encoding the expected type 2 hits p53 (*TP53*; orange) and p21 (*CDKN1A*; purple) as well as the type 1 hits *TP53BP1*, *USP28*, and *TRIM37*.

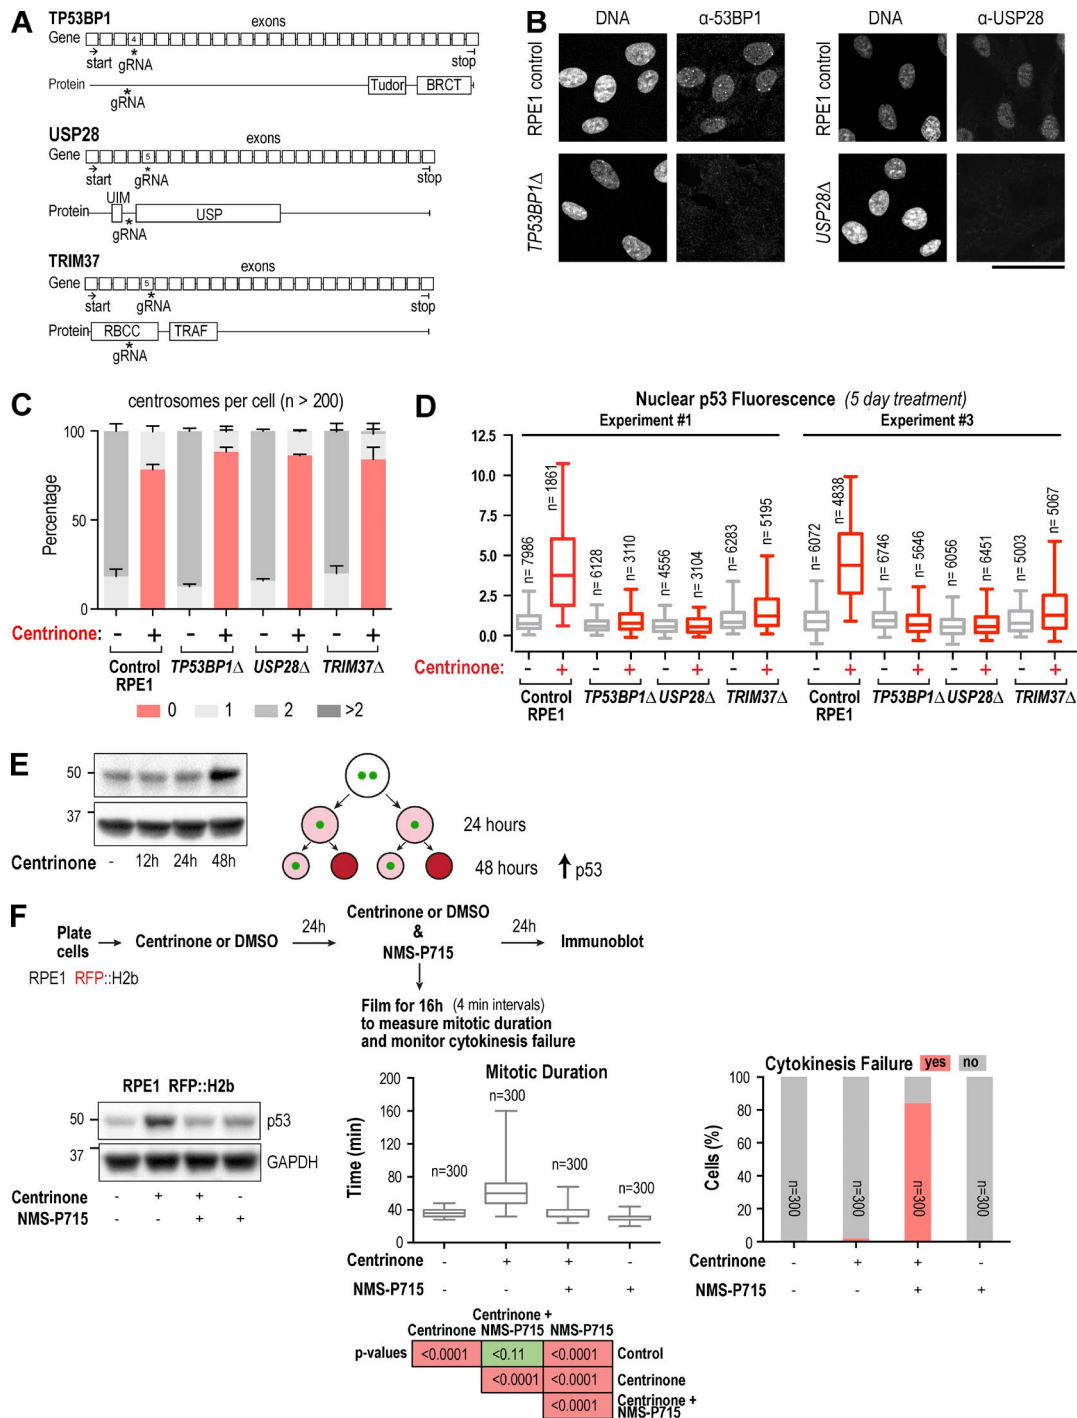

Figure S2. **Generation and characterization of single *TP53BP1*, *USP28*, and *TRIM37* knockout mutants.** (A) Locations of the gRNAs (asterisks) used to generate the single deletion mutants in the *TP53BP1*, *USP28*, and *TRIM37* genes, along with the locations in the corresponding proteins. (B) Immunofluorescence images acquired using spinning disk confocal optics of control (top row) or knockout (bottom row) RPE1 cells stained for DNA and 53BP1 (left) or DNA and USP28 (right). Bar, 50  $\mu$ m. (C) Graph shows the centrosome number distribution in control or knockout RPE1 cell lines after 5-d treatment with DMSO or centrinone. Centrosomes were identified as foci costaining for  $\gamma$ -tubulin and Cep192. Data from three experiments were analyzed. Error bars are SD. (D) Control or knockout RPE1 cell lines were treated with centrinone or DMSO (vehicle control) for 5 d and fixed and stained for DNA and with antibodies to Cep192 and p53. The graph shows mean nuclear p53 fluorescence for two independent experiments (experiments 1 and 3; data for experiment 2 are plotted in Fig. 2 E). Graph shows 5–95% box-and-whiskers plots. (E) Immunoblot shows p53 levels after 12, 24, and 48 h of centrinone treatment. Schematic summarizes the result relative to the kinetics of centrosome depletion (Wong et al., 2015). (F) Schematic outlines the experiment performed to test whether reducing mitotic duration using the Mps1 inhibitor NMS-P715 can suppress centrinone-induced p53 elevation. Cells were pretreated for 24 h with centrinone, at which point the majority of cells have one centrosome and do not yet have elevated p53 (see schematic and blot in E). The cells were then incubated with centrinone plus the specific Mps1 inhibitor NMS-P715 for an additional 24 h to determine whether it was possible to block the p53 elevation that normally occurs as the first wave of cells go from having one to zero centrosomes. In addition to monitoring the experiment by Western blotting, cells (which expressed RFP::H2B) were monitored by live cell filming. Shown are an immunoblot for p53 levels (left), a graph plotting mitotic duration, shown as 5–95% box-and-whiskers plots (middle), and a graph plotting the percentage of cells that failed chromosome segregation and cytokinesis (right).

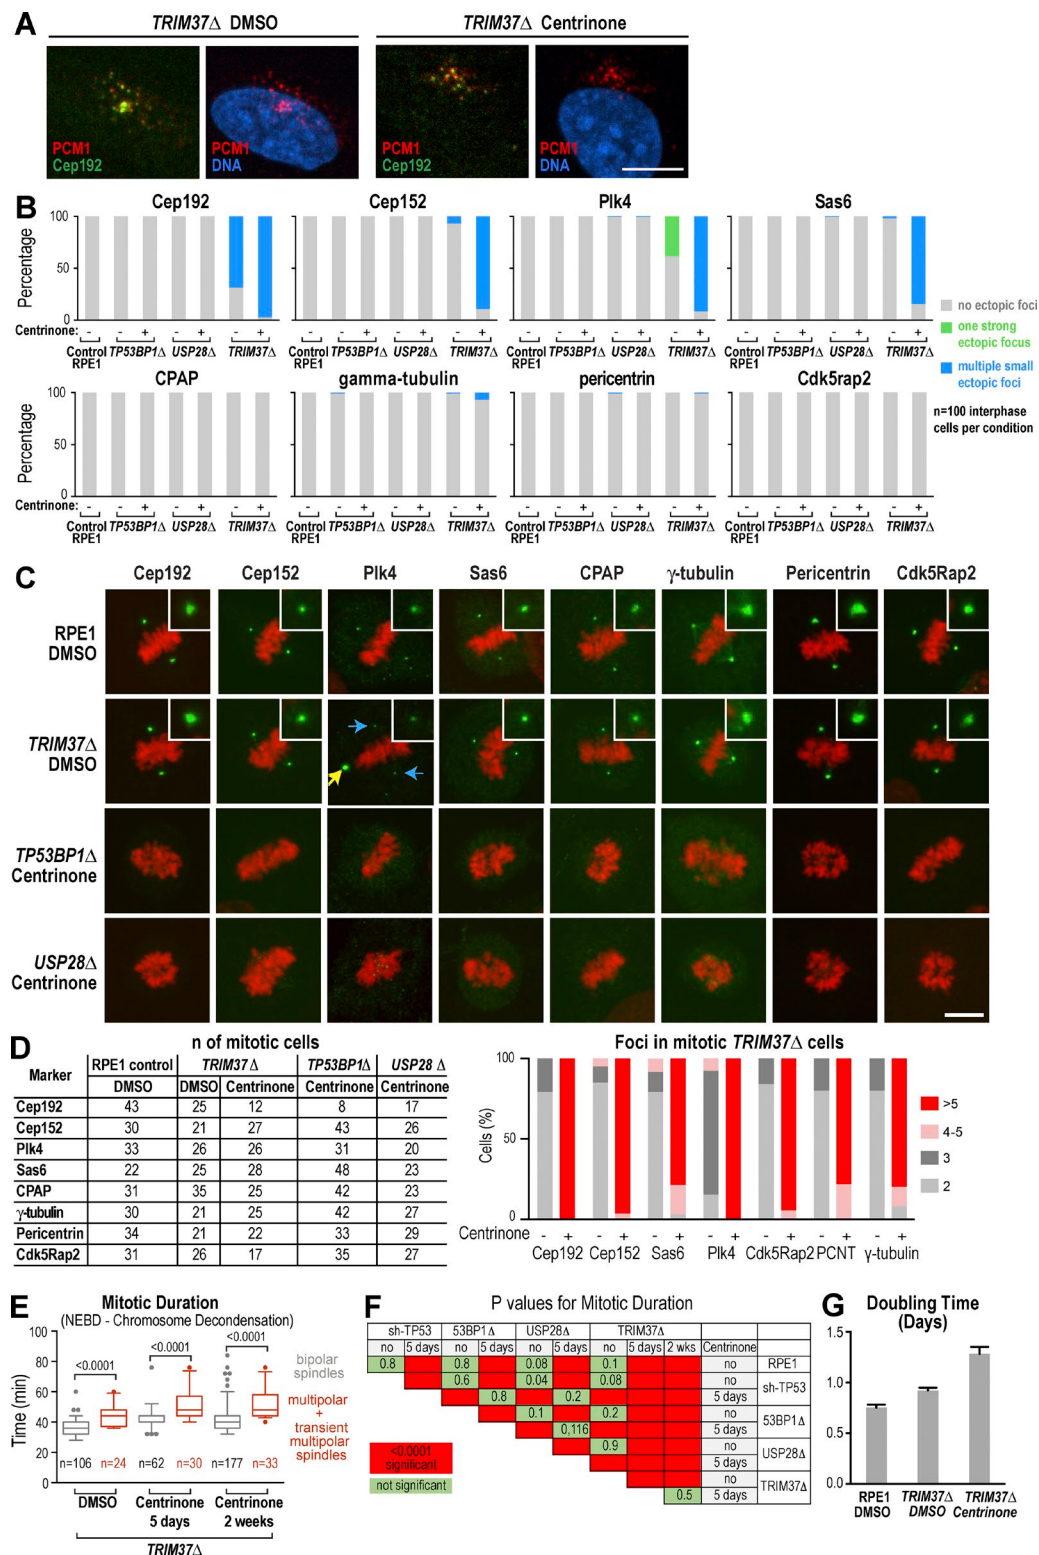

Figure S3. **Analysis of foci containing centrosomal markers in *TP53BP1* $\Delta$ , *USP28* $\Delta$ , and *TRIM37* $\Delta$ .** (A) Immunostaining shows colocalization between PCM-1 and CEP192 in *TRIM37* $\Delta$  cells treated for 5 d with DMSO or centrinone. (B) Graphs plot the percentage of interphase cells with foci containing the indicated centrosomal markers. (C) Immunofluorescence images of mitotic control RPE1, *TRIM37* $\Delta$ , *TP53BP1* $\Delta$ , and *USP28* $\Delta$  cells stained for DNA (red) and with antibodies to the indicated centrosomal proteins (green) after 5-d treatment with DMSO or centrinone (data for *TRIM37* $\Delta$  is reproduced from Fig. 4 D to facilitate comparison). Images are representative, and each marker was equivalently scaled. Yellow arrow points to bright ectopic Plk4 focus; blue arrows point to centrioles. (D) Table (left) shows number of mitotic cells analyzed for the analysis shown in Figs. 4 D and S3 C and for the quantification (right) of foci of centrosomal proteins of DMSO- and centrinone-treated mitotic *TRIM37* $\Delta$  cells. (E) Graph plots mitotic duration, shown as 5–95% box-and-whiskers plots, of bipolar and multipolar mitoses for DMSO and centrinone-treated *TRIM37* $\Delta$  cells. (F) P-values for the mitotic duration experiment shown in Fig. 5 C. (G) Doubling times in days for DMSO-treated control RPE1 and *TRIM37* $\Delta$  mutant cells, as well as *TRIM37* $\Delta$  mutant cells treated for >2 wk with centrinone ( $n = 3$ –4 triplicate measurements and SEMs are plotted). Bars, 10  $\mu$ m.

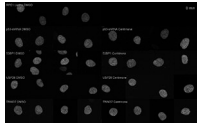

Video 1. **Mitosis in control DMSO-treated RPE1 and DMSO- and centrinone-treated p53 knockdown (*sh-TP53*), *TP53BP1Δ*, *USP28Δ*, and *TRIM37Δ* cells.** Cells were treated for 5 d with DMSO or centrinone before collection of a 5 × 2-μm confocal z-series every 4 min for 8 h. Four representative examples are shown for each condition. Images are maximum-intensity projections. Images were acquired on a CV7000 spinning disk confocal system (Yokogawa Electric Corporation) equipped with a 40× (0.95 NA) U-PlanApo objective and 2,560 × 2,160-pixel sCMOS camera (Andor Technology). Playback rate is 1,168× real time (5 frames/s).

Table S1. **Cell lines**

| Cell line | Background         | Description                |
|-----------|--------------------|----------------------------|
| MF101     | hTERT RPE-1 (ATCC) | H2B-mRFP                   |
| MF102     | hTERT RPE-1 (ATCC) | H2B-mRFP; sh-p53           |
| MF103     | hTERT RPE-1 (ATCC) | <i>TP53BP1Δ</i>            |
| MF104     | hTERT RPE-1 (ATCC) | <i>USP28Δ</i>              |
| MF105     | hTERT RPE-1 (ATCC) | <i>TRIM37Δ</i>             |
| MF106     | hTERT RPE-1 (ATCC) | <i>TP53BP1Δ</i> ; H2B-mRFP |
| MF107     | hTERT RPE-1 (ATCC) | <i>USP28Δ</i> ; H2B-mRFP   |
| MF108     | hTERT RPE-1 (ATCC) | <i>TRIM37Δ</i> ; H2B-mRFP  |

## Reference

Wong, Y.L., J.V. Anzola, R.L. Davis, M. Yoon, A. Motamedi, A. Kroll, C.P. Seo, J.E. Hsia, S.K. Kim, J.W. Mitchell, et al. 2015. Cell biology. Reversible centriole depletion with an inhibitor of Polo-like kinase 4. *Science*. 348:1155–1160. <http://dx.doi.org/10.1126/science.aaa5111>
